# Supplementary material for: A ROS-dependent mechanism promotes CDK2 phosphorylation to drive progression through S phase
Source: PubMed Central journal article supplement — Dev Cell. 2022 Jul 25;57(14):1712–1727.e9. doi: 10.1016/j.devcel.2022.06.008 (PMC9616724; doi:10.1016/j.devcel.2022.06.008), 2022-07-25
Supplement: mmc1.pdf [file mmc1.pdf]

**Developmental Cell, Volume 57**

**Supplemental information**

**A ROS-dependent mechanism  
promotes CDK2 phosphorylation  
to drive progression through S phase**

**Dilyana Georgieva Kirova, Kristyna Judasova, Julia Vorhauser, Thomas Zerjatke, Jacky Kieran Leung, Ingmar Glauche, and Jörg Mansfeld**

**Figure S1**

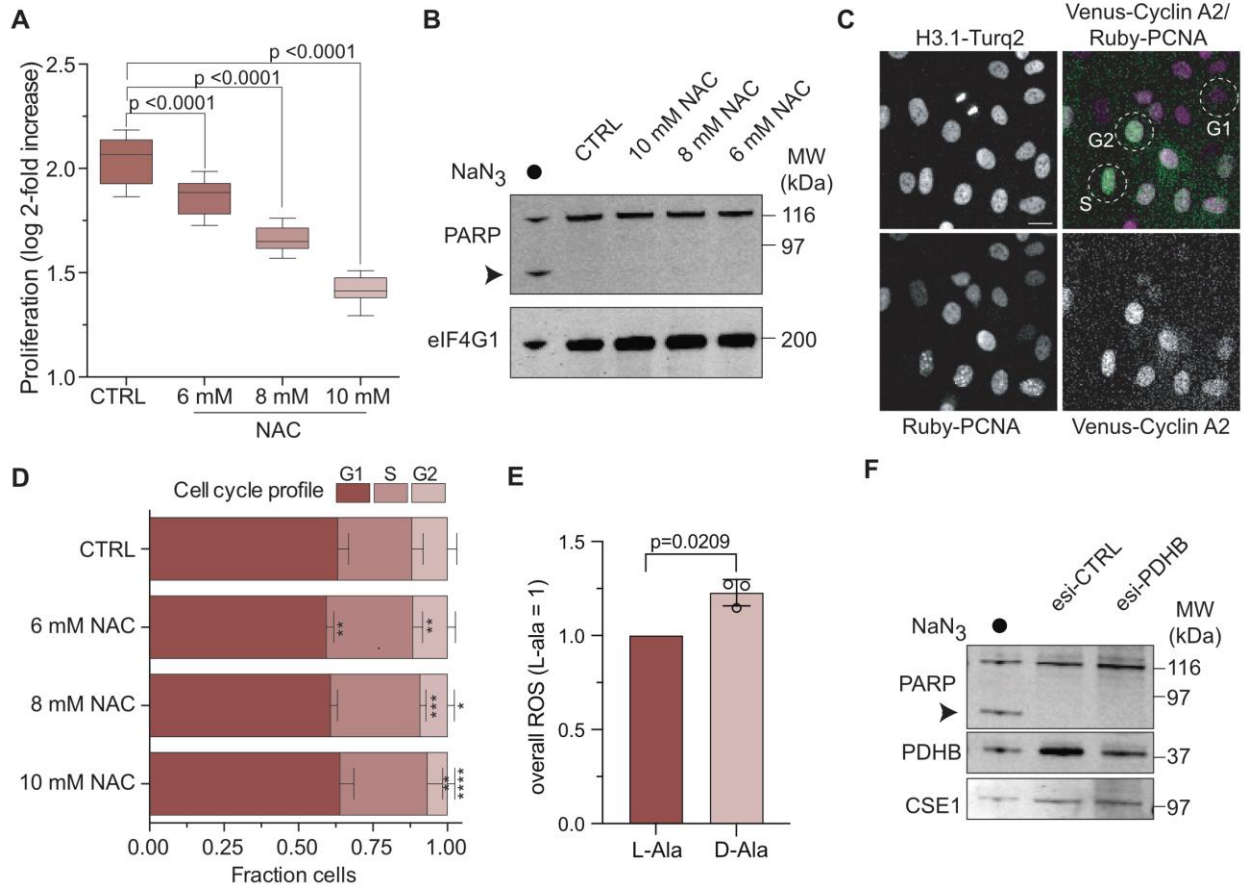

**Figure S1, related to Figure 1 and Figure 3. Interference with ROS slows cell proliferation and does not induce apoptosis.** (A) Proliferation of RPE-1 cells in the presence of NAC. Boxplots indicate the median log<sub>2</sub>-fold proliferation of cells for 48 hours. Significance according to one-way ANOVA with Dunnett's multi comparison test (n=3, N=18). (B) Western blot analysis detecting PARP cleavage in cells treated with NAC or 50  $\mu$ M sodium azide (NaN<sub>3</sub>) as a positive control. (C) Cell cycle analysis based on fluorescent markers. Cyclin A2-Venus negative cells are in G1 phase, cyclin A2-Venus positive cells are in S or G2 phase, and PCNA foci identify S phase. Circles in the overlay indicate examples of cells in G1, S and G2 phase, classified according to the expression of cyclin A2-Venus and PCNA foci. Scale bar = 10  $\mu$ m. (D) Stacked bars indicate the mean  $\pm$  SD fraction of the cells from (A) in cell cycle phases based on classification from (C). Significance according to one-way ANOVA with Holm-Sidak's multiple comparisons test: \*\* (6 mM NAC (G1) = 0.0077), \*\* (6 mM NAC (S) = 0.0085), \*\*\* (8 mM NAC (S) = 0.0007), \* (8 mM NAC (G2) = 0.0133), \*\* (10 mM NAC (S) = 0.0046), \*\*\*\* (10 mM NAC (G2) = p<0.0001), (n=3, N=18). (E) Quantification of ROS detected by CellRox Deep Red in HyPer2-DAO-NES expressing RPE-1 cells in Figure 1F in response to 0.5 mM D-alanine (D-ala). Control cells were treated either with 0.5 mM or 5 mM L-alanine (L-ala). Bars represent the mean  $\pm$  SD. Significance according to two-tailed one-sample t-test (n=3, N=3). (F) Western blot analysis assessing PARP cleavage in cells depleted of PDHB.

**Figure S2**

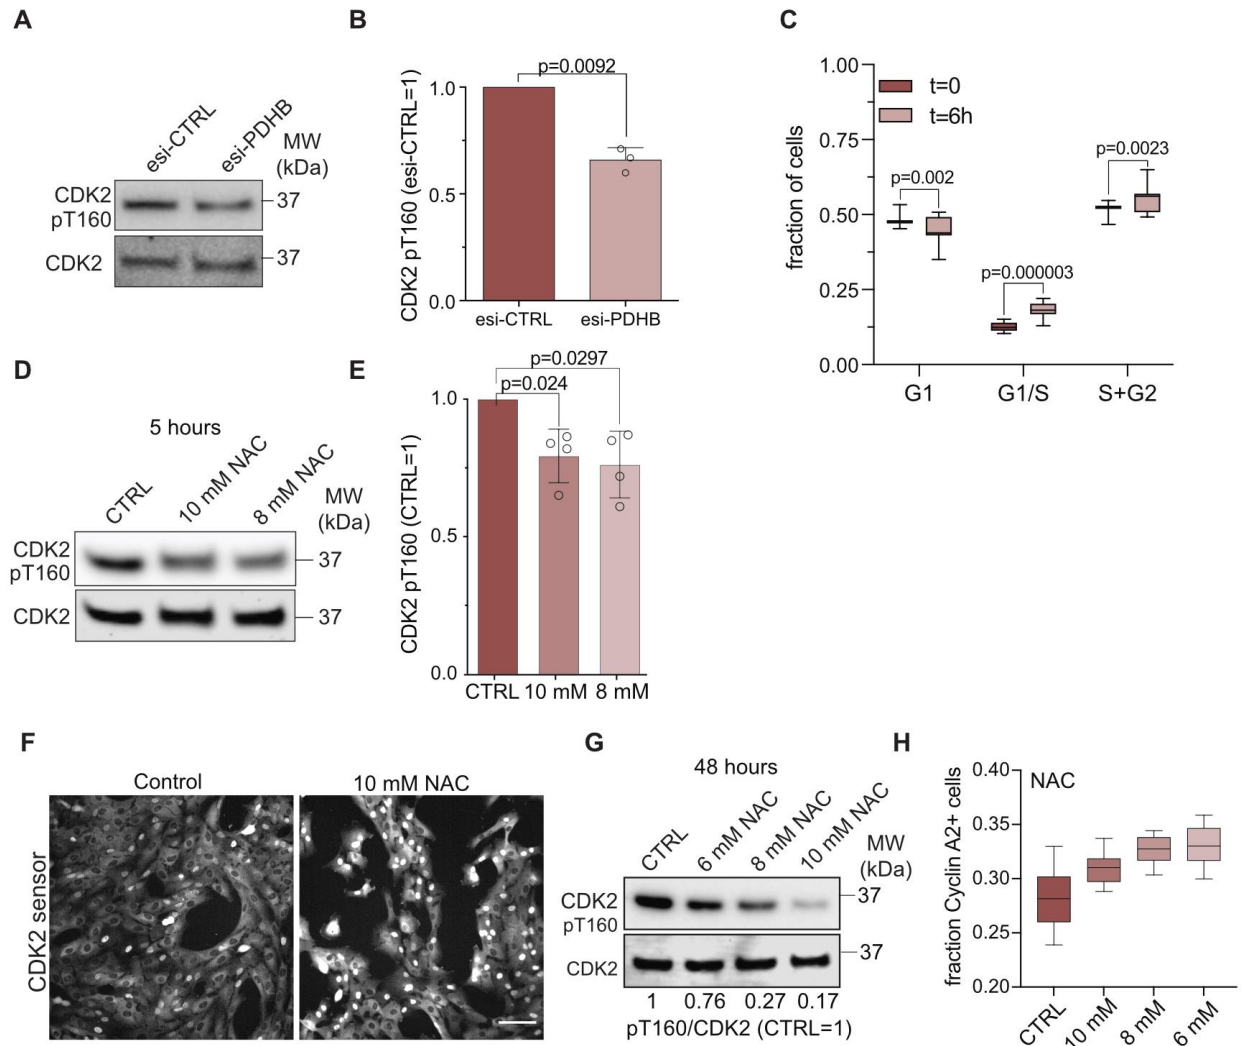

**Figure S2, related to Figure 5. Changes in CDK2 T-loop phosphorylation in response to reductive treatments.** (A) Western blot analysis showing T160 phosphorylation (pT160) in S phase synchronized RPE-1 cells depleted of PDHB for 48 hours. (B) Quantification of the data shown in (A). Bars indicate the mean  $\pm$  SD. Significance according to two-tailed one-sample t-test ( $n=3$ ,  $N=3$ ). (C) Cell cycle distribution analysis based on live cell imaging of Fucci-Gem and Fucci-Cdt expressing cells. Boxplots indicate the median fraction of cells in the indicated cell cycle phase at the beginning and after 6 hours of glutamine starvation. Significance according to two-way ANOVA with Sidak's multiple comparisons test ( $n=3$ ,  $N=18$ ). (D) Western blot analysis showing pT160 in S phase-synchronized RPE-1 cells 5 hours after treatment with NAC. (E) Quantification of the data shown in (D). Bars indicate the mean  $\pm$  SD. Significance according to two-tailed one-sample t-test ( $n=4$ ,  $N=4$ ). (F) Localization of CDK2 sensor 48 hours after treatment with NAC in RPE-1 cells. Scale bar = 100  $\mu$ m. (G) Western blot analysis ( $n=2$ ) detecting pT160 in RPE-1 cells treated with NAC for 48 hours. (H) Single-cell analysis of Cyclin A2-Venus expressing cells treated as in (G). Boxplots indicate the median fraction of Cyclin A2 positive cells in response to NAC ( $n=3$ ,  $N=18$ ).

**Figure S3**

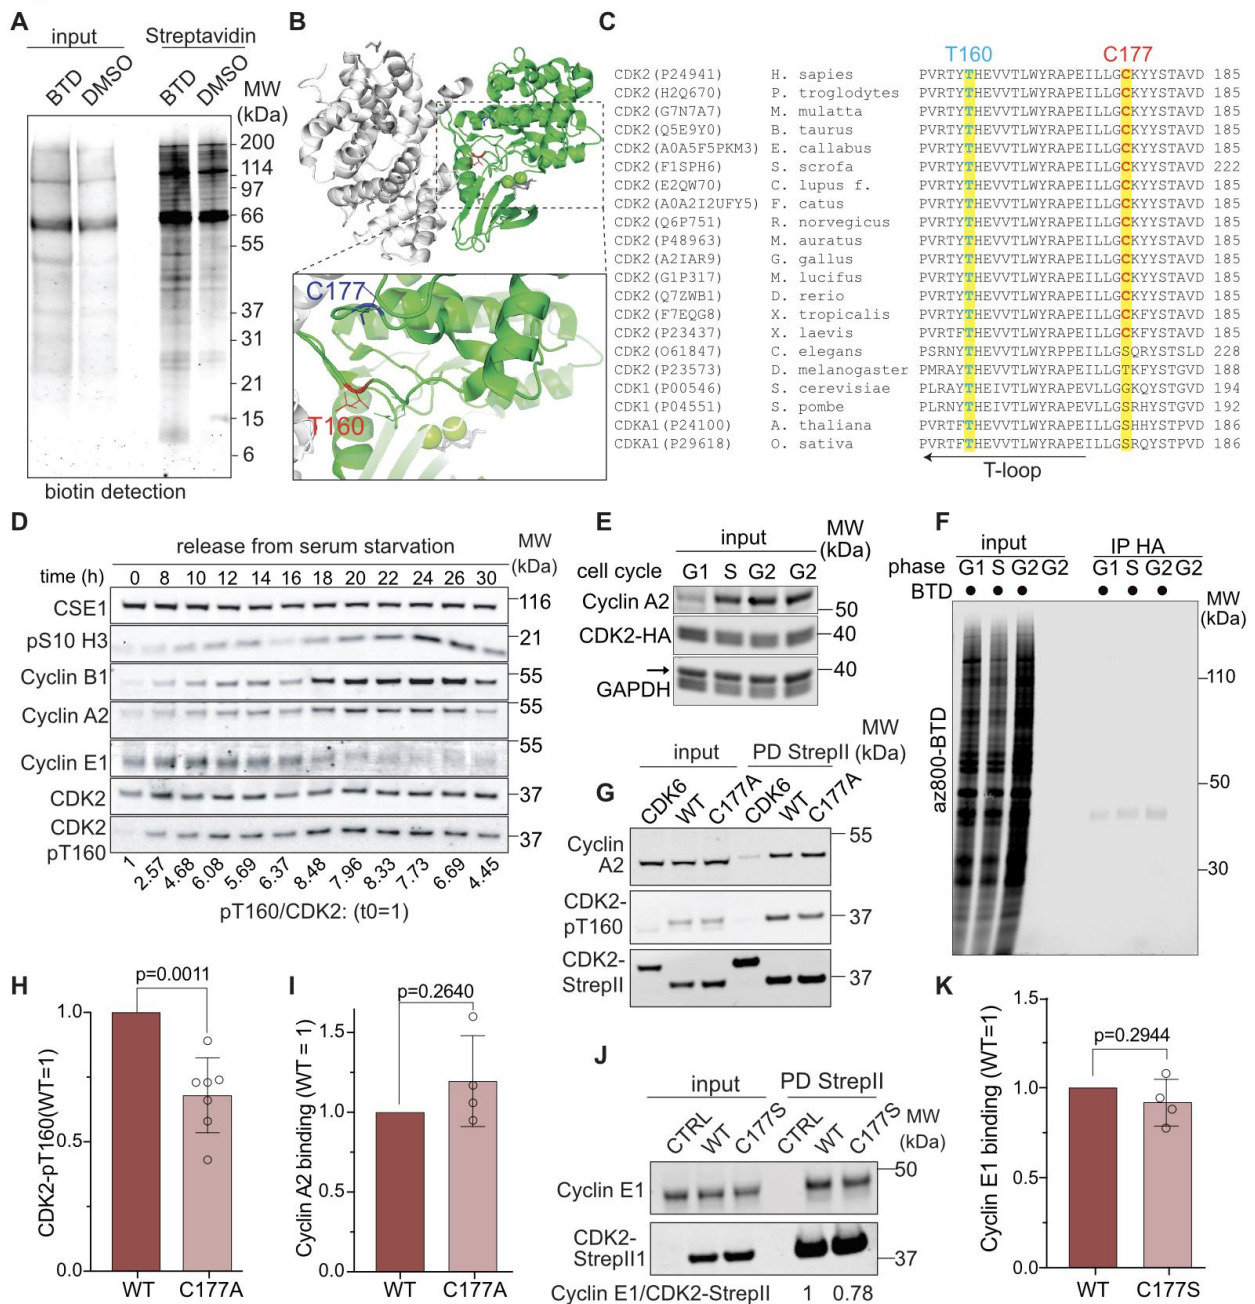

**Figure S3, related to Figure 7. CDK2 oxidation during the cell cycle and C177 mutagenesis decrease T160 phosphorylation.** (A) Biotin detection of Western Blot analysis in Figure 7B showing all BTD-biotin labeled proteins. (B) Structure of CDK2-cyclin A (PDB: 4I3Z) highlighting T160 (red) and C177 (blue). (C) Clustal Omega alignment of CDK2 kinases showing that C177 is highly conserved in vertebrates. Organisms in which CDK2 functions are exerted by a single CDK (i.e., in yeast or plants) do not contain a corresponding cysteine residue. (D) Western blot analysis (n=2) showing T-loop phosphorylation and expression of cell cycle markers in RPE-1 cells after releasing from 24h of serum starvation. The ratio of

phosphorylated T160 (pT160) to CDK2 normalized to t=0 is indicated beneath the Western blot. (E) Western blot analysis of the input samples of (F) and data shown in Figure 7D detecting the differential expression of cyclin A2 in G1 versus S and G2 phase samples. (F) Complete scan of the data presented in Figure 7D at a lower intensity to highlight differential BTB labeling of input samples at different stages of the cell cycle. (G-I) Western blot analysis and quantification of StrepII pull-downs using S-phase synchronized RPE-1 cells transiently expressing CDK2-WT-StrepII (WT) or CDK2-C177A-StrepII (C177A) or CDK6-StrepII as a control. Bars represent the mean  $\pm$  SD of pT160 and cyclin A2. Significance according to two-tailed one-sample t-test. (pT160: n=7, N=7; cyclin A2: n=4, N=4). (J-K) Western blot analysis and quantification of StrepII pull-downs using S-phase synchronized RPE-1 cells transiently expressing CDK2-WT-StrepII (WT) or CDK2-C177S-StrepII (C177S). Bars represent the mean  $\pm$  SD of Cyclin E1 binding. Significance according to two-tailed one-sample t-test. (n=4, N=4).

**Figure S4**

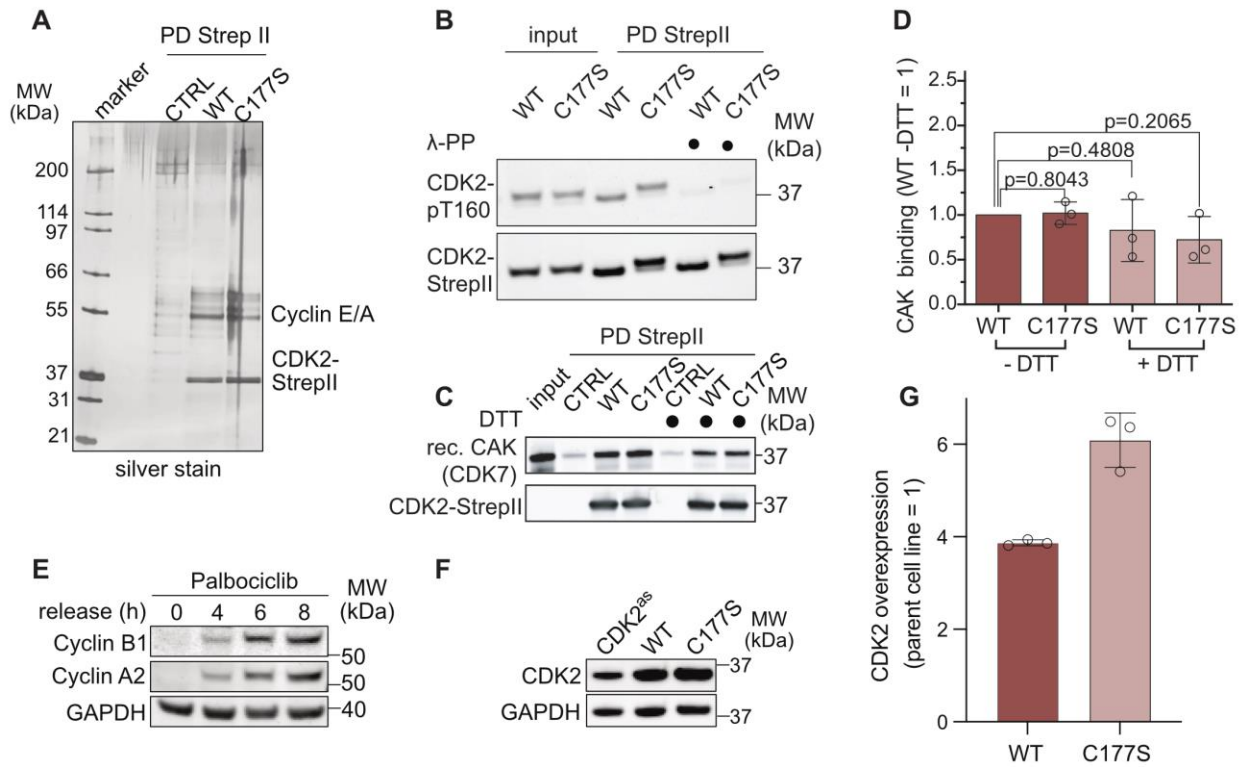

**Figure S4, related to Figure 7. CDK2-CAK binding assays and rescue of RPE-1 CDK2<sup>as</sup> cells with CDK2 WT and C177S.** (A-C) Silver staining and Western blot analysis of Strep II pull-downs of CDK2 WT and C177S from lysates of S phase synchronized cells in the absence of DTT. Note, beads-bound CDK2-StrepII was used as shown in Figure 7H and for  $\lambda$ -phosphatase ( $\lambda$ -PP) treatment (B) and subsequent binding assays with recombinant CAK in the presence or absence of DTT (C). (D) Quantification of CAK binding to CDK2-StrepII from (C). Bars represent the mean  $\pm$  SD. Significance according to two-tailed unpaired one-sample t-test. (CAK: n=3, N=3). (E) Western blot analysis (n=2) of total lysates from RPE-1 cells released from a 24-hour Palbociclib block for 4 and 6 hours (as in Figure 7N), corresponding to early and mid S phase. (F) Western blot analysis of total lysates prepared from parent CDK2<sup>as</sup> cells and CDK2<sup>as</sup> cells stably expressing untagged CDK2 WT or C177S. (G) Quantification of CDK2 WT and C177S expression shown in (F) normalized to endogenous CDK2 levels in parental RPE-1 CDK2<sup>as</sup> cells. Bars represent the mean and  $\pm$  SD. (n=3, N=3).

**Supplemental Table 1. Generation of cell lines, related to STAR Methods.**

| No. | Name                                                                                   | Plasmid used | Parental cell line | Insert                                         | Method                                            | Reference      |
|-----|----------------------------------------------------------------------------------------|--------------|--------------------|------------------------------------------------|---------------------------------------------------|----------------|
| 1   | RPE-1                                                                                  | NA           | NA                 | NA                                             | NA                                                | RRID:CVCL_4388 |
| 2   | RPE-1 FRT/TR                                                                           | NA           | NA                 | NA                                             | NA                                                | RRID:CVCL_VP32 |
| 3   | RPE-1 mRuby-PCNA, Histone3.1-mTurquoise2, CylinA2-mVenus                               | NA           | NA                 | NA                                             | NA                                                | PMID: 28564611 |
| 4   | RPE-1 FRT/TR mRuby-PCNA                                                                | NA           | NA                 | NA                                             | NA                                                | PMID: 28564611 |
| 5   | RPE-1 FRT/TR mRuby-PCNA, Histone3.1-iRFP                                               | 1            | 4                  | Histone3.1-iRFP                                | endogenous knock-in by rAAV gene-targeting        | this study     |
| 6   | RPE-1 FRT/TR mRuby-PCNA Histone3.1-iRFP, mAG-hGeminin (1-110)                          | 2            | 5                  | mAG-Geminin (1-110)                            | ectopic expression, electroporation               | this study     |
| 7   | RPE-1 FRT/TR mRuby-PCNA, Histone3.1-mTurquoise2                                        | 3            | 4                  | Histone 3.1-mTurquoise2                        | endogenous knock-in by rAAV gene-targeting        | this study     |
| 8   | RPE-1 FRT/TR mRuby-PCNA, Histone3.1-mTurquoise2, Cdk2 sensor (DHB-Venus)               | 5            | 7                  | CDK sensor (DHB-Venus)                         | ectopic expression, electroporation               | this study     |
| 9   | RPE-1 FRT/TR CDK2 sensor (DHB-mCherry)                                                 | 13           | 1                  | CDK2 sensor (DHB-mCherry)                      | ectopic expression, electroporation               | this study     |
| 10  | RPE-1 FRT/TR Clover-hGeminin(1-110), Histone3.1-mTurquoise2, CDK2 sensor (DHB-mCherry) | 17           | 9                  | Clover-hGeminin(1-110), Histone3.1-mTurquoise2 | ectopic expression, electroporation               | this study     |
| 11  | RPE-1 FRT/TR mRuby-PCNA + Histone 3.1-iRFP + Hyper2-DAO-NES                            | 18           | 5                  | HyPer2-DAO-NES                                 | ectopic expression, viral transduction            | this study     |
| 12  | RPE-1 FRT/TR Hyper2-DAO-NLS                                                            | 18           | 2                  | HyPer2-DAO-NLS                                 | ectopic expression, viral transduction            | this study     |
| 13  | RPE-1 FRT/TR CDK2 sensor (DHB-mCherry), NLS-DAO-HyPer2                                 | 11           | 12                 | CDK2 sensor (DHB-mCherry)                      | ectopic expression, electroporation               | this study     |
| 14  | RPE-1 FRT/TR Hyper2-DAO-NES                                                            | 24           | 2                  | NES-DAO-HyPer2                                 | ectopic expression, viral transduction            | this study     |
| 15  | RPE-1 FRT/TR CDK2 sensor (DHB-mCherry), NES-DAO-HyPer2                                 | 11           | 14                 | CDK2 sensor (DHB-mCherry)                      | ectopic expression, electroporation               | this study     |
| 16  | RPE-1 FRT/TR mKO2-hCdt1(30-120), Clover-hGeminin(1-110)                                | 16           | 2                  | mKO2-hCdt1(30-120), Clover-hGeminin(1-110)     | ectopic expression, electroporation               | this study     |
| 17  | RPE-1 FRT/TR Hyper7 + mRuby-PCNA + Histone 3.1-iRFP                                    | 19           | 5                  | HyPer7                                         | ectopic expression, electroporation               | this study     |
| 18  | RPE-1 CDK2-as                                                                          | NA           | NA                 | NA                                             | NA                                                | PMID: 21658603 |
| 19  | RPE-1 CDK2-as + CDK2 WT + eGFP (pool of 5 independent clones)                          | 26           | 18                 | CDK2-WT_IRES2_eGFP                             | ectopic expression, electroporation               | this study     |
| 20  | RPE-1 CDK2-as + CDK2 C177S + mRuby (pool of 5 independent clones)                      | 27           | 18                 | CDK2-C177S_IRES2_mRuby                         | ectopic expression, electroporation               | this study     |
| 21  | RPE-1 FRT/TR CDK2-HA (WT)                                                              | 28           | 2                  | CDK2-WT-HA                                     | integration into single FRT site, electroporation | this study     |

|    |                              |    |   |               |                                                   |            |
|----|------------------------------|----|---|---------------|---------------------------------------------------|------------|
| 22 | RPE-1 FRT/TR CDK2-HA (C177S) | 29 | 2 | CDK2-C177S-HA | integration into single FRT site, electroporation | this study |
|----|------------------------------|----|---|---------------|---------------------------------------------------|------------|

NA=not applicable



**Supplemental Table 2. Plasmids, related to STAR Methods.**

| No. | Name                                     | Backbone   | Insert                      | Method                                                                                                                                                                                                                                                            | Resistance bacteria | Resistance cell line | Source         |
|-----|------------------------------------------|------------|-----------------------------|-------------------------------------------------------------------------------------------------------------------------------------------------------------------------------------------------------------------------------------------------------------------|---------------------|----------------------|----------------|
| 1   | pAAV-Histone3.1-iRFP                     | pAAV       | Histone3.1-iRFP             | PCR of iRFP from RRID:Addgene 45465 with primers (5'-acgcGTCGACggtgcaggcggagccgg aggtgcgggtggggctggaggagcagctga aggatccgtcgccaggcagcctgacc-3') and (5'-CCCaaagcttTCActtccatcacgccgatctgcc-3') from 25 and cloning into 3 using Sall and HindIII restriction sites | Ampicillin          | NA                   | this study     |
| 2   | pcDNA3 mAG-Geminin (1/110)               | pcDNA3     | mAG-Geminin (1-110)         | NA                                                                                                                                                                                                                                                                | Ampicillin          | Neomycin             | PMID 18267078  |
| 3   | pAAV-H3.1-mTurquoise2                    | pAAV       | H3.1-mTurquoise2            | NA                                                                                                                                                                                                                                                                | Ampicillin          | NA                   | PMID: 28564611 |
| 4   | CSII-CDK2 sensor (Venus)                 | CSII       | CDK2 sensor (DHB-Venus)     | NA                                                                                                                                                                                                                                                                | Ampicillin          | NA                   | PMID 24075009  |
| 5   | pIRESNeomycin3-CDK2-sensor (Venus)       | pIRESNeo3  | CDK2 sensor (DHB-Venus)     | Subcloning of DHB-Venus from plasmid 4 into pIRESNeomycin3 using AgeI, HPAI and BamHI restriction sites                                                                                                                                                           | Ampicillin          | Neomycin             | this study     |
| 6   | CAGGS-NLS-Flag-Cas9-IRES-Puromycin       | NA         | NLS-Flag-Cas9 (WT nuclease) | NA                                                                                                                                                                                                                                                                | Ampicillin          | Puromycin            | PMID 27216209  |
| 7   | pIRES2-EGFP                              | pIRES      | EGFP                        | NA                                                                                                                                                                                                                                                                | Kanamycin           | Neomycin             | Clontech       |
| 8   | pIRESNeomycin3                           | pIRESNeo3  | empty                       | NA                                                                                                                                                                                                                                                                | Ampicillin          | Neomycin             | Clontech       |
| 9   | pIRESNeomycin3-CAGGS promoter            | pIRESNeo3  | CAGGS promoter              | Subcloning of CAGGS promoter from plasmid 6 into 8 using SnaBI and NheI restriction sites                                                                                                                                                                         | Ampicillin          | Neomycin             | this study     |
| 10  | CSII-CDK2 sensor (DHB-mCherry)           | CSII       | CDK2 sensor (DHB-mCherry)   | NA                                                                                                                                                                                                                                                                | Ampicillin          | NA                   | PMID 24075009  |
| 11  | pIRESNeomycin3-CDK2 sensor (DHB-mCherry) | pIRESNeo3  | CDK2 sensor (DHB-mCherry)   | PCR of DHB-mCherry with primers (5'-Ggaattcaccatgacaaatgatgtcacctgg-3') and (5'-ATAAGAATgcccgccttactgtacagctgctccatgcc-3') from plasmid 10 and cloning into 9 using EcoRI and NotI restriction sites                                                              | Ampicillin          | Neomycin             | this study     |
| 12  | pIRES-Puromycin3                         | pIRESPuro3 | NA                          | NA                                                                                                                                                                                                                                                                | Ampicillin          | Puromycin            | Clontech       |
| 13  | pIRES-Puromycin3                         | pIRESNeo3  | CDK2 sensor                 | Subcloning of DHB-mCherry from plasmid 11 into 12 using NdeI and NotI restriction sites                                                                                                                                                                           | Ampicillin          | Puromycin            | this study     |

|    |                                                      |                |                                                  |                                                                                                                                                                                                                                                                                                                  |            |          |                     |
|----|------------------------------------------------------|----------------|--------------------------------------------------|------------------------------------------------------------------------------------------------------------------------------------------------------------------------------------------------------------------------------------------------------------------------------------------------------------------|------------|----------|---------------------|
|    | CDK2 sensor (DHB-mCherry)                            |                | (DHB-mCherry)                                    |                                                                                                                                                                                                                                                                                                                  |            |          |                     |
| 14 | pLL3.7m-Clover-Geminin(1-110)-IRES-mKO2-Cdt(30-120)  | pLL3.7m        | Clover-Geminin(1-110)-IRES-mKO2-Cdt(30-120)      | NA                                                                                                                                                                                                                                                                                                               | Ampicillin | NA       | RRID:Add gene_83841 |
| 15 | pC1-HyPer-3                                          | pC1            | HyPer-3                                          | NA                                                                                                                                                                                                                                                                                                               | Kanamycin  | Neomycin | RRID:Add gene_42131 |
| 16 | pC1-Clover-Geminin(1-110)-IRES-mKO2-Cdt(30-120)      | pC1            | Clover-Geminin(1-110)-IRES-mKO2-Cdt(30-120)      | Subcloning of Clover-Geminin(1-110)-IRES-mKO2-Cdt(30-120) from plasmid 14 into 15 using NheI and SmaI restriction sites                                                                                                                                                                                          | Kanamycin  | Neomycin | this study          |
| 17 | pC1-Clover-Geminin(1-110)-IRES-Histone3.1-Turquoise2 | pC1            | Clover-Geminin(1-110)-IRES-Histone3.1-Turquoise2 | PCR of Clover-Geminin(1-110)-IRES-Histone3.1-Turquoise2 with primers (5'-CGgaattcATGGCGCGTACTAAGCAGAC-3') and (5'-CGGGATCctcactgtacagctcgccatgc-3') from 3 and cloned into 16 using EcoRI and BamHI restriction sites                                                                                            | Kanamycin  | Neomycin | this study          |
| 18 | pAAV-Hyper2-DAO-NLS                                  | pAAV           | Hyper2-DAO-NLS                                   | NA                                                                                                                                                                                                                                                                                                               | Ampicillin | NA       | PMID 24020354       |
| 19 | pCS2-HyPer7                                          | pCS2           | HyPer7                                           | NA                                                                                                                                                                                                                                                                                                               | Ampicillin | NA       | PMID 32130885       |
| 20 | pIRESNeomycin3-CDK2-StrepII-WT                       | pIRESNeomycin3 | CDK2-StrepII-WT                                  | PCR of CDK2-StrepII-WT with primers (5'-ccgCTCGAGATGGAGAACTTCCAAAAGGTGGAAAAG-3') and (5'-cgGGATCCTCATTTCGAACTGCGGGTGGCTCCAGCCAGCGCCGAGTCTGAAGATGGGGTACTGGCTTGGTCACATCC-3') from cDNA and cloning into 8 using XhoI and BamHI restriction sites                                                                   | Ampicillin | Neomycin | this study          |
| 21 | pIRESNeomycin3-CDK2-StrepII-C177S                    | pIRESNeomycin3 | CDK2-StrepII-C177S                               | PCR CDK2-StrepII-C177S with primers (5'-tgtgtaccgagctcctgaaatcctctgggctgcaaataattccacagctgtggacatctggagcctgggcAGcatcttctgctgagatgggactcgccgggcc-3') and (5'-cgGGATCCTCATTTCGAACTGCGGGTGGCTCCAGCCAGCGCCGAGTCTGAAGATGGGGTACTGGCTTGGTCACATCC-3') from 20 and cloning into 20 using SacI and BamHI restriction sites | Ampicillin | Neomycin | this study          |
| 22 | pIRESNeomycin3-CDK2-StrepII-C177A                    | pIRESNeomycin3 | CDK2-StrepII-C177A                               | PCR of CDK2-StrepII-C177A with primers (5'-tgtgtaccgagctcctgaaatcctctgggctgcaaataattccacagctgtggacatctggagcctgggcGCcatcttctgctgagatgggactcgccgggcc-3') and (5'-cgGGATCCTCATTTCGAACTGCGGGTGGCTCCAGCCAGCGCC                                                                                                        | Ampicillin | Neomycin | this study          |

|    |                                                   |                                            |                          |                                                                                                                                                                                                                                                                                |            |          |                            |
|----|---------------------------------------------------|--------------------------------------------|--------------------------|--------------------------------------------------------------------------------------------------------------------------------------------------------------------------------------------------------------------------------------------------------------------------------|------------|----------|----------------------------|
|    |                                                   |                                            |                          | GAGTCGAAGATGGGGTACTGG<br>CTTGGTCACATCC-3') from 20<br>and re-cloned into 20 using SacI<br>and BamHI restriction sites                                                                                                                                                          |            |          |                            |
| 23 | pIRESN<br>eomycin<br>3-Cdk6-<br>StreptII-<br>WT   | pIRESNeo<br>3                              | CDK6-<br>StreptII-WT     | PCR of CDK6 with primers (5'-<br>ccgCTCGAGATGGAGAAGGACG<br>GCCTGTGCCGCGTACC-3')<br>and (5'-<br>cgGGATCCTCATTTCGAACTG<br>CGGGTGGCTCCAGCCAGCGCC<br>GGCTGTATTACGCTCCGAGGT<br>GTTCTGGCTGGGCGGCAGG-3')<br>from cDNA and cloning into 8<br>using XhoI and BamHI restriction<br>sites | Ampicillin | Neomycin | this study                 |
| 24 | pAAV-<br>Hyper2-<br>DAO-<br>NES                   | pAAV                                       | Hyper2-<br>DAO-NES       | NA                                                                                                                                                                                                                                                                             | Ampicillin | NA       | PMID<br>24020354           |
| 25 | pMito-<br>iRFP713                                 | pN1                                        | iRFP713                  | NA                                                                                                                                                                                                                                                                             | Kanamycin  | Neomycin | RRID:Add<br>gene_<br>45465 |
| 26 | pIRES2-<br>CDK2(W<br>T)-<br>IRES2-<br>eGFP        | pAAV                                       | CDK2 WT<br>+ eGFP        | PCR of CDK2 from plasmid 28<br>with 5'-<br>ccgCTCGAGATGGAGAATTCC<br>AAAAGGTGGAAAAG-3' and 5'-<br>cgGGATCCtcagagtcgaagatgggta<br>ctgg-3' and cloning into the XhoI<br>and BamHI sites of 7                                                                                      | Ampicillin | Neomycin | this study                 |
| 27 | pIRES2-<br>CDK2(C<br>177S)-<br>IRES2-<br>mRuby    | pN1                                        | CDK2<br>C177S +<br>mRuby | PCR of CDK2 from plasmid 29<br>with 5'-<br>ccgCTCGAGATGGAGAATTCC<br>AAAAGGTGGAAAAG-3' and 5'-<br>cgGGATCCtcagagtcgaagatgggta<br>ctgg-3' cloning into the XhoI and<br>BamHI sites of 7, where eGFP<br>was replaced by mRuby                                                     | Kanamycin  | Neomycin | this study                 |
| 28 | pDNA5<br>FRT/TO<br>CDK2(W<br>T)-HA                | pCDNA5<br>FRT/TO<br>neo                    | CDK2-<br>WT-HA           | Subcloning of CDK2 WT from<br>plasmid 30 (NotI and AfeI) into<br>plasmid 32 (NotI and EcoRV)                                                                                                                                                                                   | Ampicillin | Neomycin | this study                 |
| 29 | pIRESN<br>eomycin<br>3_CDK2<br>(C177S)<br>-HA     | pCDNA5<br>FRT/TO<br>neomycin<br>resistance | CDK2-<br>C177S-HA        | Subcloning of CDK2 C177S from<br>plasmid 31 into plasmid 28 using<br>BsrG1 and NotI                                                                                                                                                                                            | Ampicillin | Neomycin | this study                 |
| 30 | pIRESN<br>eomycin<br>3_CDK2<br>(WT)-HA            | pIRESNeo<br>3                              | CDK2-<br>WT-HA           | PCR of CDK2 WT from plasmid 20<br>with 5'-<br>ccgCTCGAGATGGAGAATTCC<br>AAAAGGTGGAAAAG-3' and 5'-<br>gcGGATCCtcacgcatagtcaggaacat<br>cgtatgggtaGCCAGCGCCgagtcgaa<br>gatggggtactggctgtgcatcc-3' and<br>cloning into the XhoI and BamHI<br>sites of plasmid 8                     | Kanamycin  | Neomycin | this study                 |
| 31 | pIRESN<br>eomycin<br>3-<br>CDK2(C<br>177S)-<br>HA | pIRESNeo<br>3                              | CDK2-<br>C177S-HA        | PCR of CDK2 C177S from<br>plasmid 21 with 5'-<br>ccgCTCGAGATGGAGAATTCC<br>AAAAGGTGGAAAAG-3' and 5'-<br>gcGGATCCtcacgcatagtcaggaacat<br>cgtatgggtaGCCAGCGCCgagtcgaa<br>gatggggtactggctgtgcatcc-3' and<br>cloning into the XhoI and BamHI<br>sites of plasmid 8                  | Kanamycin  | Neomycin | this study                 |

NA=not applicable
